# Supplementary material
Source: HighWire-hosted journal article supplement (https://jnm.snmjournals.org/highwire/filestream/95489/field_highwire_adjunct_files/0/222919_Supplemental_Data.pdf)
Supplement: 222919_Supplemental_Data.pdf [file 222919_Supplemental_Data.pdf]

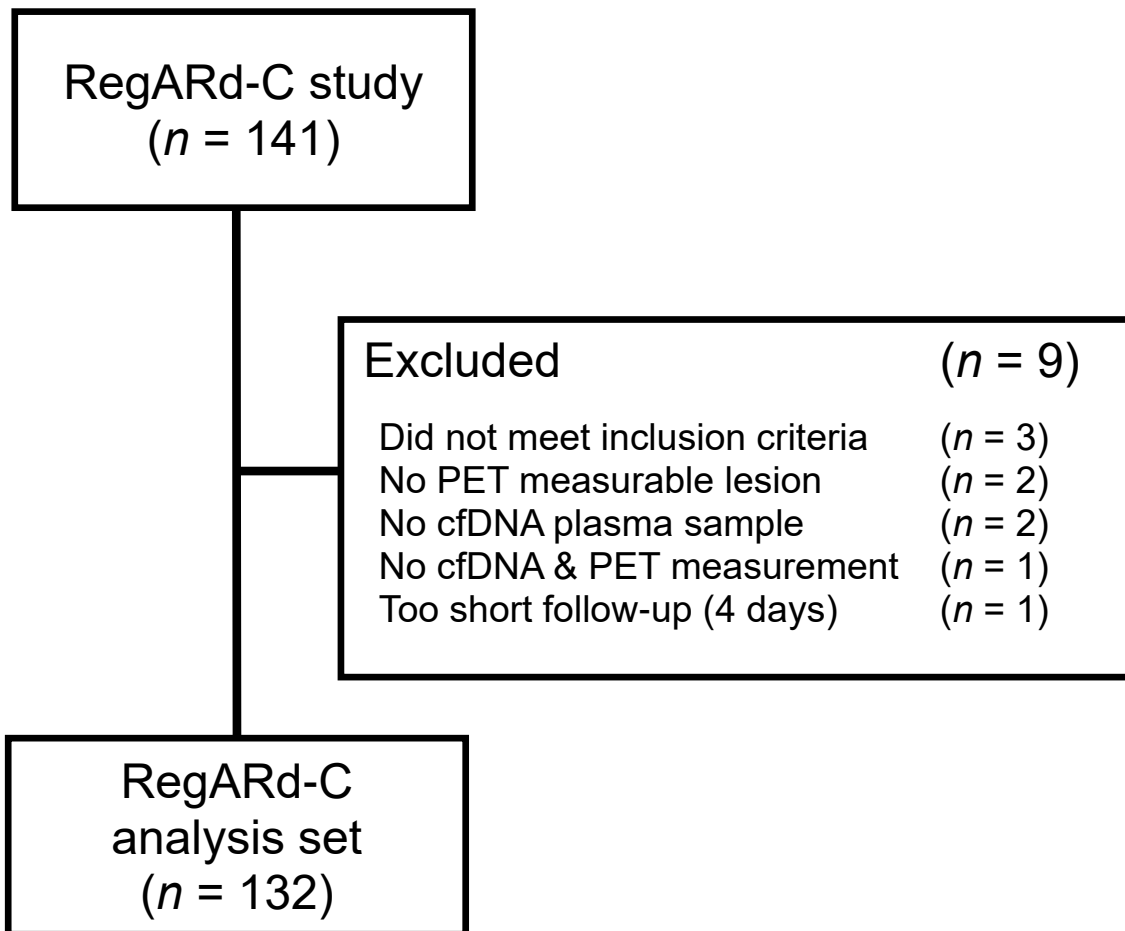

**SUPPLEMENTAL FIGURE 1.** Patient recruitment for the cfDNA-PET study from the RegARd-C trial.

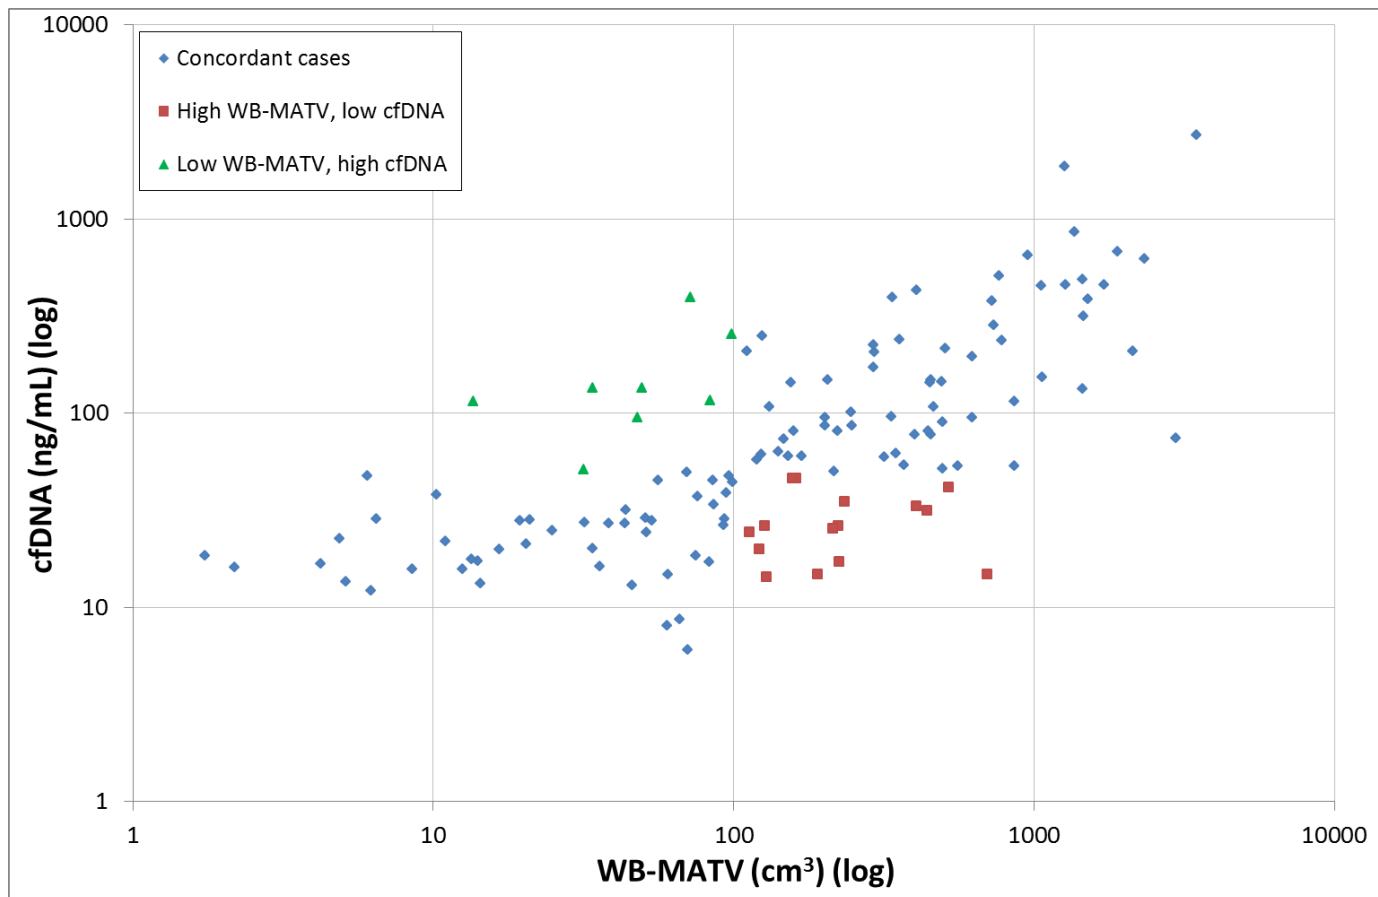

**SUPPLEMENTAL FIGURE 2.** Correlation between baseline cfDNA and WB-MATV for a total of 132 patients. Each dot represents a patient's cfDNA and WB-MATV values. The x-axis for WB-MATV and y-axis for cfDNA are both represented using a logarithmic scale.

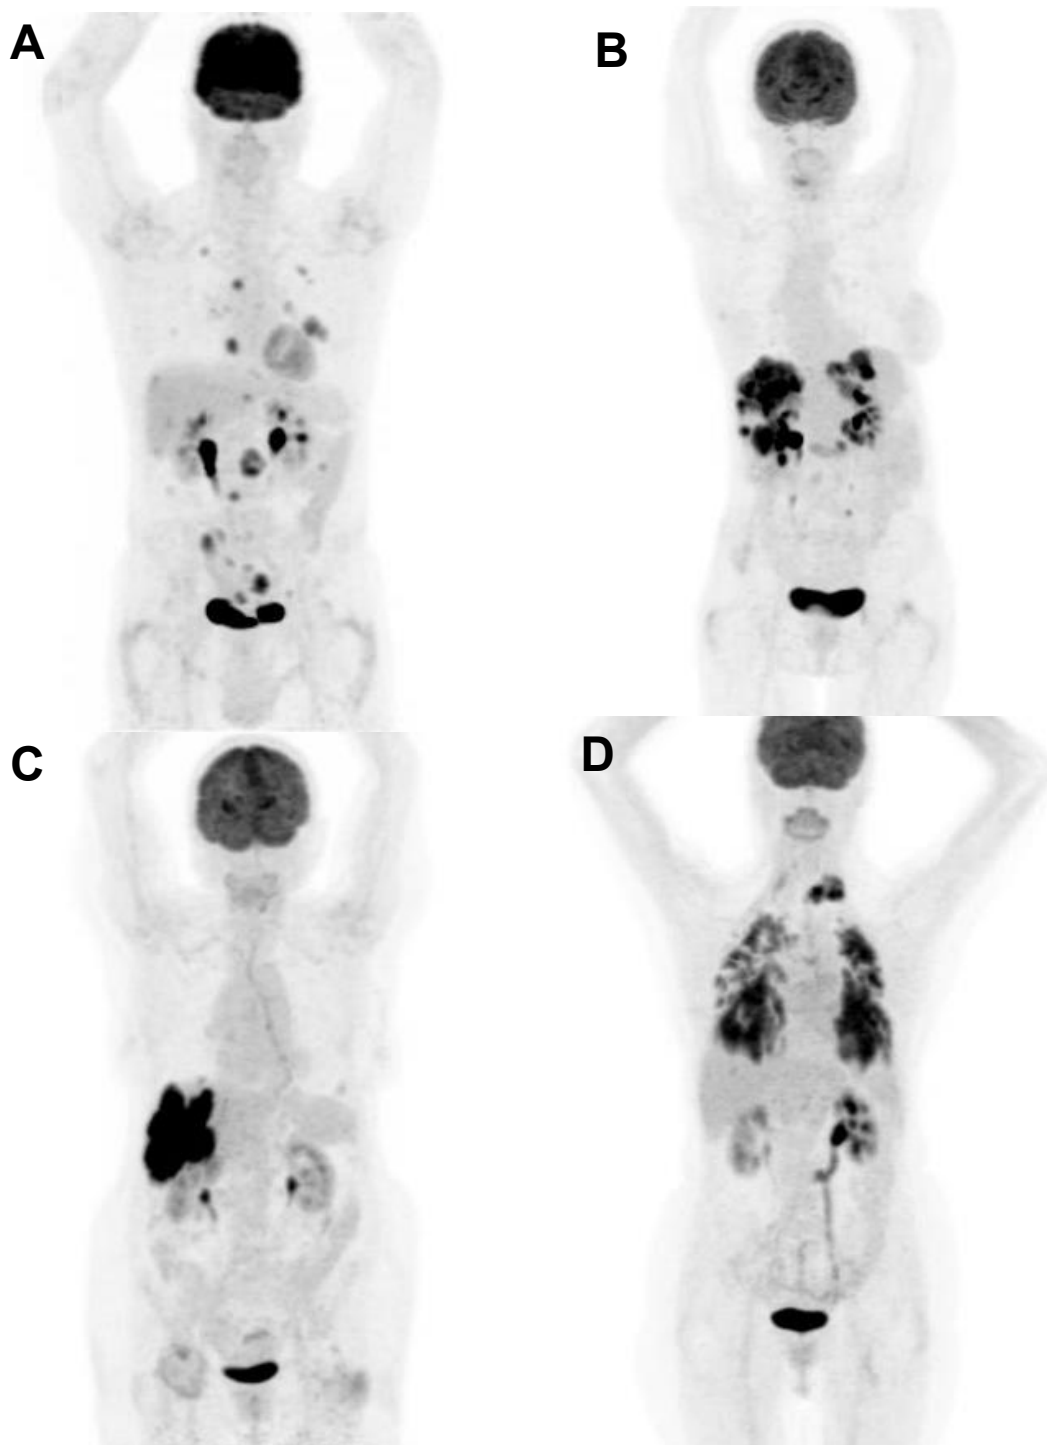

**Supplemental FIGURE 3.** Illustrations of patients with low baseline cfDNA ( $< 50$  ng/mL) and high baseline WB-MATV ( $\geq 100$  cm<sup>3</sup>). Patients with lung, lymph node, and peritoneum metastatic involvement (A), liver involvement (B, C), and lung and osteo-medullary involvement (D).
